# Supplementary material for: Physiological and Transcriptomic Analysis Reveals the Melatonin Alleviates Aluminum Toxicity in Alfalfa (Medicago sativa L.)
Source: Preprints.org preprint supplement (doi:10.20944/preprints202311.0249.v1), 2023-11-03
Supplement: Supplementary file 1 [file supplementary]

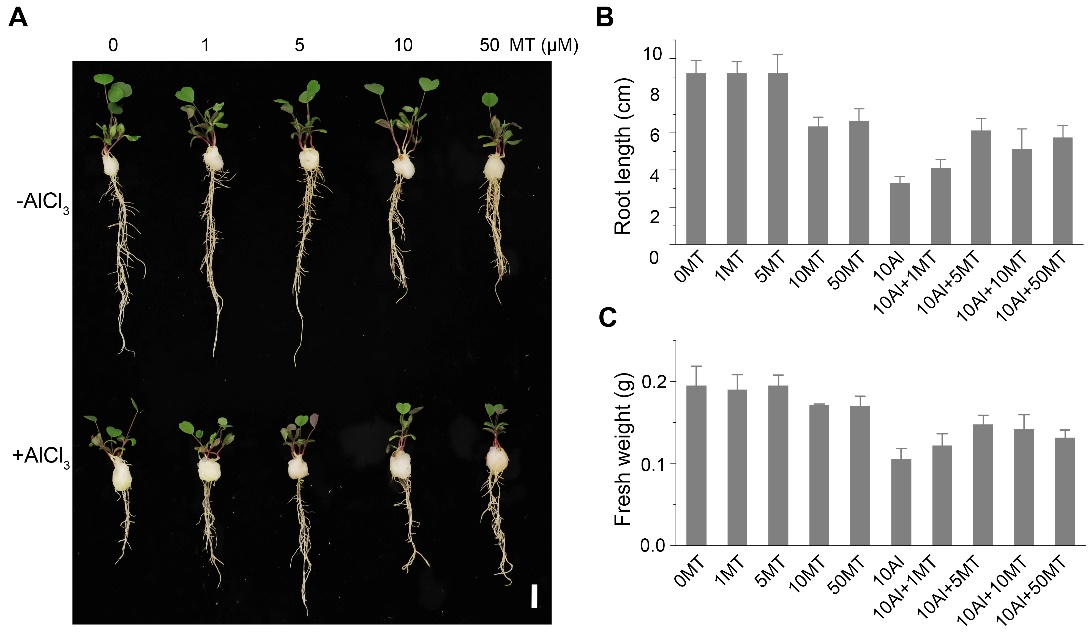


**Supplementary Figure S1:** Effectsof different concentrations of melatonin on the phenotype of alfalfa. (A) Phenotypes after 5d of AlCl3 and melatonin treatment. Scale bar, 1cm. (B) Root length, data were means ± SE n=16. (C) Fresh weight of 4 alfalfa seedlings on a cotton ball, data were mean ± SE n=4.


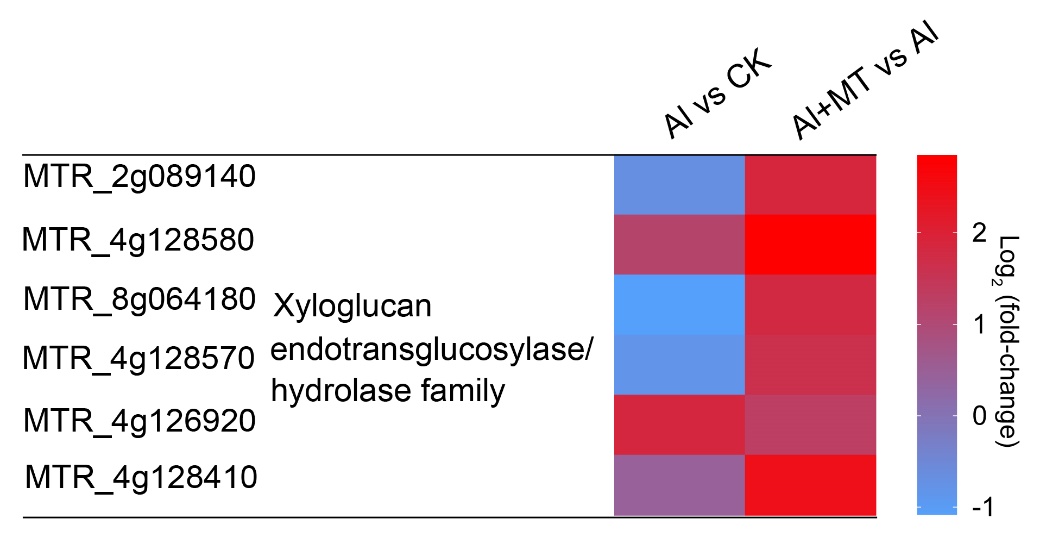


**Supplementary Figure S2:** Transcript changes in cell wall-related genes induced by Al and melatonin.
